# Supplementary material for: Renal Failure Associated with APECED and Terminal 4q Deletion: Evidence of Autoimmune Nephropathy
Source: Hindawi journal article supplement (doi:10.1155/2010/586342), 2010-01-01
Supplement: f1 [file 586342.f1.pdf]

NCBI MAPVIEWER BUILD 37.1 (The current/Latest build)

Region Displayed: 177,600K-191,200K bp

Genes in Region: 90

| Chr4 Start | Chr4 Stop | Symbol                       | O | OMIM                 | HGNC                 | Evidence    | Cyto         | Description                                                                                 |
|------------|-----------|------------------------------|---|----------------------|----------------------|-------------|--------------|---------------------------------------------------------------------------------------------|
| 177604694  | 177713895 | <a href="#">VEGFC</a>        | - | <a href="#">OMIM</a> | <a href="#">HGNC</a> | best RefSeq | 4q34.1-q34.3 | vascular endothelial growth factor C                                                        |
| 178230991  | 178284092 | <a href="#">NEIL3</a>        | + | <a href="#">OMIM</a> | <a href="#">HGNC</a> | best RefSeq | 4            | nei endonuclease VIII-like 3 (E. coli)                                                      |
| 178351924  | 178363591 | <a href="#">AGA</a>          | - | <a href="#">OMIM</a> | <a href="#">HGNC</a> | best RefSeq | 4q32-q33     | aspartylglucosaminidase                                                                     |
| 178649907  | 178911669 | <a href="#">LOC285501</a>    | + |                      |                      | best RefSeq | 4            | hypothetical protein LOC285501                                                              |
| 179207825  | 179208518 | <a href="#">RPL19P8</a>      | + |                      | <a href="#">HGNC</a> | best RefSeq | 4            | ribosomal protein L19 pseudogene 8                                                          |
| 179990579  | 179990770 | <a href="#">LOC100288304</a> | + |                      |                      | protein     | 4            | similar to cytochrome c oxidase subunit II                                                  |
| 181494617  | 181494906 | <a href="#">LOC100288337</a> | - |                      |                      | protein     | 4            | hypothetical LOC100288337                                                                   |
| 182443813  | 182444574 | <a href="#">LOC132386</a>    | + |                      |                      | best RefSeq | 4            | tumor-associated calcium signal transducer 1 pseudogene                                     |
| 182525584  | 182526434 | <a href="#">LOC100288373</a> | + |                      |                      | mRNA        | 4            | hypothetical protein LOC100288373                                                           |
| 182826942  | 182827602 | <a href="#">LOC100128118</a> | - |                      |                      | protein     | 4            | similar to cyclin H                                                                         |
| 183060159  | 183065668 | <a href="#">MGC45800</a>     | - |                      |                      | best RefSeq | 4            | hypothetical LOC90768                                                                       |
| 183090446  | 183090531 | <a href="#">MIR1268</a>      | + |                      |                      | external    | 4q34.3       | microRNA 1268                                                                               |
| 183245137  | 183724177 | <a href="#">ODZ3</a>         | + | <a href="#">OMIM</a> | <a href="#">HGNC</a> | best RefSeq | 4            | odz, odd Oz/ten-m homolog 3 (Drosophila)                                                    |
| 183811244  | 183838630 | <a href="#">DCTD</a>         | - | <a href="#">OMIM</a> | <a href="#">HGNC</a> | best RefSeq | 4            | dCMP deaminase                                                                              |
| 183949753  | 183950224 | <a href="#">LOC100132090</a> | - |                      |                      | best RefSeq | 4            | survival motor neuron pseudogene                                                            |
| 183958818  | 183961272 | <a href="#">FAM92A3</a>      | + |                      | <a href="#">HGNC</a> | best RefSeq | 4q35.1       | family with sequence similarity 92, member A3                                               |
| 184018170  | 184020352 | <a href="#">LOC100128823</a> | + |                      |                      | mRNA        | 4            | hypothetical LOC100128823                                                                   |
| 184018174  | 184020352 | <a href="#">C4orf38</a>      | - |                      | <a href="#">HGNC</a> | best RefSeq | 4            | chromosome 4 open reading frame 38                                                          |
| 184020463  | 184241930 | <a href="#">WWC2</a>         | + |                      | <a href="#">HGNC</a> | best RefSeq | 4            | WW and C2 domain containing 2                                                               |
| 184239220  | 184241927 | <a href="#">CLDN22</a>       | - |                      | <a href="#">HGNC</a> | best RefSeq | 4            | claudin 22                                                                                  |
| 184242917  | 184243579 | <a href="#">CLDN24</a>       | - |                      |                      | protein     | 4            | claudin-24-like                                                                             |
| 184272251  | 184302858 | <a href="#">LOC100129666</a> | + |                      |                      | protein     | 4            | similar to chimerin (chimaerin) 1                                                           |
| 184340035  | 184340958 | <a href="#">LOC100127981</a> | - |                      |                      | protein     | 4            | similar to fibrillarlin                                                                     |
| 184362513  | 184366612 | <a href="#">LOC100131811</a> | - |                      |                      | mRNA        | 4            | hypothetical LOC100131811                                                                   |
| 184365789  | 184369049 | <a href="#">CDKN2AIP</a>     | + |                      | <a href="#">HGNC</a> | best RefSeq | 4            | CDKN2A interacting protein                                                                  |
| 184404506  | 184405569 | <a href="#">LOC389246</a>    | + |                      |                      | best RefSeq | 4            | VT11B pseudogene                                                                            |
| 184426220  | 184432249 | <a href="#">ING2</a>         | + | <a href="#">OMIM</a> | <a href="#">HGNC</a> | best RefSeq | 4q35.1       | inhibitor of growth family, member 2                                                        |
| 184560789  | 184580331 | <a href="#">RWDD4A</a>       | - |                      | <a href="#">HGNC</a> | best RefSeq | 4            | RWD domain containing 4A                                                                    |
| 184580446  | 184634745 | <a href="#">C4orf41</a>      | + |                      | <a href="#">HGNC</a> | best RefSeq | 4            | chromosome 4 open reading frame 41                                                          |
| 184826509  | 184938875 | <a href="#">STOX2</a>        | + |                      | <a href="#">HGNC</a> | best RefSeq | 4            | storkhead box 2                                                                             |
| 185009859  | 185139114 | <a href="#">ENPP6</a>        | - |                      | <a href="#">HGNC</a> | best RefSeq | 4            | ectonucleotide pyrophosphatase/phosphodiesterase 6                                          |
| 185175688  | 185176474 | <a href="#">RPL6P16</a>      | + |                      | <a href="#">HGNC</a> | best RefSeq | 4            | ribosomal protein L6 pseudogene 16                                                          |
| 185220282  | 185238554 | <a href="#">LOC391722</a>    | - |                      |                      | protein     | 4            | similar to myosin regulatory light chain MRCL2                                              |
| 185262843  | 185269065 | <a href="#">LOC728175</a>    | - |                      |                      | mRNA        | 4            | similar to MGC24125 protein                                                                 |
| 185308876  | 185395726 | <a href="#">IRF2</a>         | - | <a href="#">OMIM</a> | <a href="#">HGNC</a> | best RefSeq | 4q34.1-q35.1 | interferon regulatory factor 2                                                              |
| 185480329  | 185480937 | <a href="#">LOC100129245</a> | - |                      |                      | protein     | 4            | similar to nucleolar protein family A, member 1                                             |
| 185548850  | 185570629 | <a href="#">CASP3</a>        | - | <a href="#">OMIM</a> | <a href="#">HGNC</a> | best RefSeq | 4q34         | caspase 3, apoptosis-related cysteine peptidase                                             |
| 185570767  | 185616112 | <a href="#">CCDC111</a>      | + |                      | <a href="#">HGNC</a> | best RefSeq | 4            | coiled-coil domain containing 111                                                           |
| 185615236  | 185655286 | <a href="#">MLF1IP</a>       | - | <a href="#">OMIM</a> | <a href="#">HGNC</a> | best RefSeq | 4            | MLF1 interacting protein                                                                    |
| 185676749  | 185747215 | <a href="#">ACSL1</a>        | - | <a href="#">OMIM</a> | <a href="#">HGNC</a> | best RefSeq | 4q34-q35     | acyl-CoA synthetase long-chain family member 1                                              |
| 185719450  | 185720200 | <a href="#">SLED1</a>        | + |                      |                      | best RefSeq | 4            | RTFV9368                                                                                    |
| 185940083  | 185941926 | <a href="#">HELT</a>         | + |                      | <a href="#">HGNC</a> | best RefSeq | 4            | HES/HEY-like transcription factor                                                           |
| 186064398  | 186068425 | <a href="#">SLC25A4</a>      | + | <a href="#">OMIM</a> | <a href="#">HGNC</a> | best RefSeq | 4q35         | solute carrier family 25 (mitochondrial carrier; adenine nucleotide translocator), member 4 |
| 186080819  | 186125182 | <a href="#">KIAA1430</a>     | - |                      | <a href="#">HGNC</a> | best RefSeq | 4            | KIAA1430                                                                                    |
| 186131284  | 186285120 | <a href="#">SNX25</a>        | + |                      | <a href="#">HGNC</a> | best RefSeq | 4            | sorting nexin 25                                                                            |
| 186285032  | 186300152 | <a href="#">LRP2BP</a>       | - |                      | <a href="#">HGNC</a> | best RefSeq | 4            | LRP2 binding protein                                                                        |
| 186317840  | 186321390 | <a href="#">ANKRD37</a>      | + |                      | <a href="#">HGNC</a> | best RefSeq | 4            | ankyrin repeat domain 37                                                                    |
| 186321443  | 186347068 | <a href="#">UFSP2</a>        | - | <a href="#">OMIM</a> | <a href="#">HGNC</a> | best RefSeq | 4            | UFM1-specific peptidase 2                                                                   |
| 186346203  | 186348049 | <a href="#">LOC100288644</a> | + |                      |                      | mRNA        | 4            | hypothetical protein LOC100288644                                                           |
| 186350545  | 186370821 | <a href="#">C4orf47</a>      | + |                      | <a href="#">HGNC</a> | best RefSeq | 4            | chromosome 4 open reading frame 47                                                          |
| 186366336  | 186392913 | <a href="#">CCDC110</a>      | - | <a href="#">OMIM</a> | <a href="#">HGNC</a> | best RefSeq | 4            | coiled-coil domain containing 110                                                           |
| 186392591  | 186393417 | <a href="#">LOC100131727</a> | + |                      |                      | mRNA        | 4            | hypothetical LOC100131727                                                                   |
| 186421814  | 186422626 | <a href="#">LOC100131683</a> | - |                      |                      | mRNA        | 4            | hypothetical protein LOC100131683                                                           |
| 186422851  | 186456712 | <a href="#">PDLIM3</a>       | - | <a href="#">OMIM</a> | <a href="#">HGNC</a> | best RefSeq | 4q35         | PDZ and LIM domain 3                                                                        |

|           |           |                              |   |                      |                      |             |          |                                                                                                          |
|-----------|-----------|------------------------------|---|----------------------|----------------------|-------------|----------|----------------------------------------------------------------------------------------------------------|
| 186506598 | 186877870 | <a href="#">SORBS2</a>       | - |                      | <a href="#">HGNC</a> | best RefSeq | 4        | sorbin and SH3 domain containing 2                                                                       |
| 186990309 | 187006252 | <a href="#">TLR3</a>         | + | <a href="#">OMIM</a> | <a href="#">HGNC</a> | best RefSeq | 4q35     | toll-like receptor 3                                                                                     |
| 187065995 | 187093817 | <a href="#">FAM149A</a>      | + |                      | <a href="#">HGNC</a> | best RefSeq | 4        | family with sequence similarity 149, member A                                                            |
| 187110186 | 187113275 | <a href="#">FUJ38576</a>     | - |                      |                      | mRNA        | 4        | hypothetical LOC651430                                                                                   |
| 187112674 | 187134617 | <a href="#">CYP4V2</a>       | + | <a href="#">OMIM</a> | <a href="#">HGNC</a> | best RefSeq | 4        | cytochrome P450, family 4, subfamily V, polypeptide 2                                                    |
| 187148672 | 187179625 | <a href="#">KLB1</a>         | + | <a href="#">OMIM</a> | <a href="#">HGNC</a> | best RefSeq | 4q34-q35 | kallikrein B, plasma (Fletcher factor) 1                                                                 |
| 187187118 | 187210835 | <a href="#">F11</a>          | + | <a href="#">OMIM</a> | <a href="#">HGNC</a> | best RefSeq | 4q35     | coagulation factor XI                                                                                    |
| 187249609 | 187250834 | <a href="#">SLC25A5P6</a>    | - |                      | <a href="#">HGNC</a> | best RefSeq | 4        | solute carrier family 25 (mitochondrial carrier; adenine nucleotide translocator), member 5 pseudogene 6 |
| 187454809 | 187476537 | <a href="#">MTNR1A</a>       | - | <a href="#">OMIM</a> | <a href="#">HGNC</a> | best RefSeq | 4q35.1   | melatonin receptor 1A                                                                                    |
| 187508937 | 187644987 | <a href="#">FAT1</a>         | - | <a href="#">OMIM</a> | <a href="#">HGNC</a> | best RefSeq | 4q35     | FAT tumor suppressor homolog 1 (Drosophila)                                                              |
| 187543069 | 187544347 | <a href="#">LOC100286957</a> | + |                      |                      | mRNA        | 4        | hypothetical protein LOC100286957                                                                        |
| 187821893 | 187821995 | <a href="#">MRPS36P2</a>     | + |                      | <a href="#">HGNC</a> | best RefSeq | 4q35.1   | mitochondrial ribosomal protein S36 pseudogene 2                                                         |
| 188667288 | 188669359 | <a href="#">LOC644325</a>    | - |                      |                      | protein     | 4        | similar to a disintegrin and metalloprotease domain 25                                                   |
| 188891427 | 188892438 | <a href="#">LOC389249</a>    | + |                      |                      | protein     | 4        | similar to peroxiredoxin 6                                                                               |
| 188916925 | 188926199 | <a href="#">ZFP42</a>        | + |                      | <a href="#">HGNC</a> | best RefSeq | 4        | zinc finger protein 42 homolog (mouse)                                                                   |
| 189012427 | 189026408 | <a href="#">TRIML2</a>       | - |                      | <a href="#">HGNC</a> | best RefSeq | 4        | tripartite motif family-like 2                                                                           |
| 189027712 | 189028068 | <a href="#">FAUP3</a>        | + |                      | <a href="#">HGNC</a> | best RefSeq | 4q35.2   | FBR-MuSV-associated ubiquitously expressed (fox derived) pseudogene 3                                    |
| 189060598 | 189068649 | <a href="#">TRIML1</a>       | + |                      | <a href="#">HGNC</a> | best RefSeq | 4        | tripartite motif family-like 1                                                                           |
| 189270472 | 189271201 | <a href="#">RPL7AP27</a>     | - |                      | <a href="#">HGNC</a> | best RefSeq | 4        | ribosomal protein L7a pseudogene 27                                                                      |
| 189308625 | 189315164 | <a href="#">LOC644491</a>    | - |                      |                      | protein     | 4        | similar to NMDA receptor regulated 2                                                                     |
| 189659525 | 189662227 | <a href="#">LOC285442</a>    | + |                      |                      | best RefSeq | 4        | mitochondrial translational release factor 1-like pseudogene                                             |
| 190394060 | 190396545 | <a href="#">HSP90AA4P</a>    | + |                      | <a href="#">HGNC</a> | best RefSeq | 4q35.2   | heat shock protein 90kDa alpha (cytosolic), class A member 4 (pseudogene)                                |
| 190861974 | 190884359 | <a href="#">FRG1</a>         | + | <a href="#">OMIM</a> | <a href="#">HGNC</a> | best RefSeq | 4q35     | FSHD region gene 1                                                                                       |
| 190903678 | 190906026 | <a href="#">TUBB4Q</a>       | - |                      | <a href="#">HGNC</a> | best RefSeq | 4q35     | tubulin, beta polypeptide 4, member Q                                                                    |
| 190940255 | 190945506 | <a href="#">DUX4C</a>        | - |                      |                      | protein     | 4q35.2   | double homeobox 4c                                                                                       |
| 190945522 | 190948412 | <a href="#">FRG2</a>         | - | <a href="#">OMIM</a> | <a href="#">HGNC</a> | best RefSeq | 4q35     | FSHD region gene 2                                                                                       |
| 190959056 | 190959857 | <a href="#">LOC644881</a>    | - |                      |                      | protein     | 4        | similar to chemerin preproprotein                                                                        |
| 190962073 | 190964569 | <a href="#">LOC100132380</a> | + |                      |                      | protein     | 4        | similar to Angiogenic factor with G patch and FHA domains 1                                              |
| 190987701 | 190990406 | <a href="#">LOC100287020</a> | + |                      |                      | mRNA        | 4        | similar to facioscapulohumeral muscular dystrophy                                                        |
| 190992093 | 190993703 | <a href="#">LOC653543</a>    | + |                      |                      | best RefSeq | 4        | double homeobox, 4-like                                                                                  |
| 190995386 | 190996996 | <a href="#">LOC653544</a>    | + |                      |                      | best RefSeq | 4        | double homeobox, 4-like                                                                                  |
| 190998679 | 191000289 | <a href="#">LOC653545</a>    | + |                      |                      | best RefSeq | 4        | double homeobox, 4-like                                                                                  |
| 191001979 | 191003583 | <a href="#">LOC441056</a>    | + |                      |                      | mRNA        | 4        | double homeobox, 4-like                                                                                  |
| 191005267 | 191006883 | <a href="#">DUX4</a>         | + | <a href="#">OMIM</a> | <a href="#">HGNC</a> | best RefSeq | 4q35     | double homeobox, 4                                                                                       |
| 191008566 | 191010176 | <a href="#">LOC653548</a>    | + |                      |                      | mRNA        | 4        | double homeobox, 4-like                                                                                  |
| 191011866 | 191013476 | <a href="#">LOC728410</a>    | + |                      |                      | best RefSeq | 4        | double homeobox, 4-like                                                                                  |
